# Supplementary material
Source: PubMed Central journal article supplement (PMC1134979)

Supplementary Figure 1  
**Chemical structure of the BB94 variant bound to the resin**

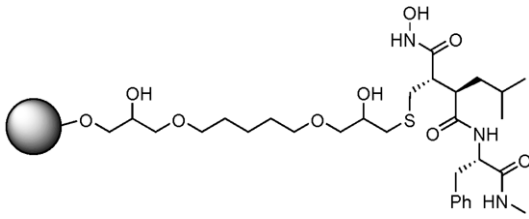

Supplementary Figure 2  
**MS/MS peptide sequence summary of the purified 50-kDa soluble MT1-MMP form**

These MS/MS spectra were then correlated with known sequences. Residue #1 is the Tyr<sup>112</sup> at the beginning of the soluble 50-kDa MT1-MMP and known to be the N-terminus of active MT1-MMP. The red arrow indicates Val<sup>524</sup> at the C-terminus of the 50-kDa MT1-MMP form.

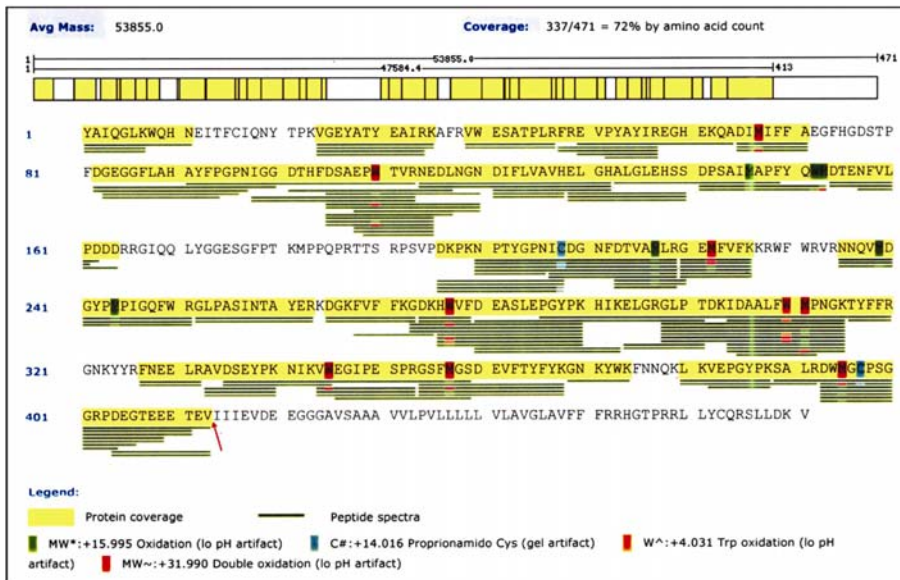

Supplement: bj3870497add.pdf [file bj3870497add.pdf]
